# Supplementary material
Source: PubMed Central journal article supplement (PMC5980763)
Supplement: NIHMS955202-supplement-Supplemental.pdf [file NIHMS955202-supplement-Supplemental.pdf]

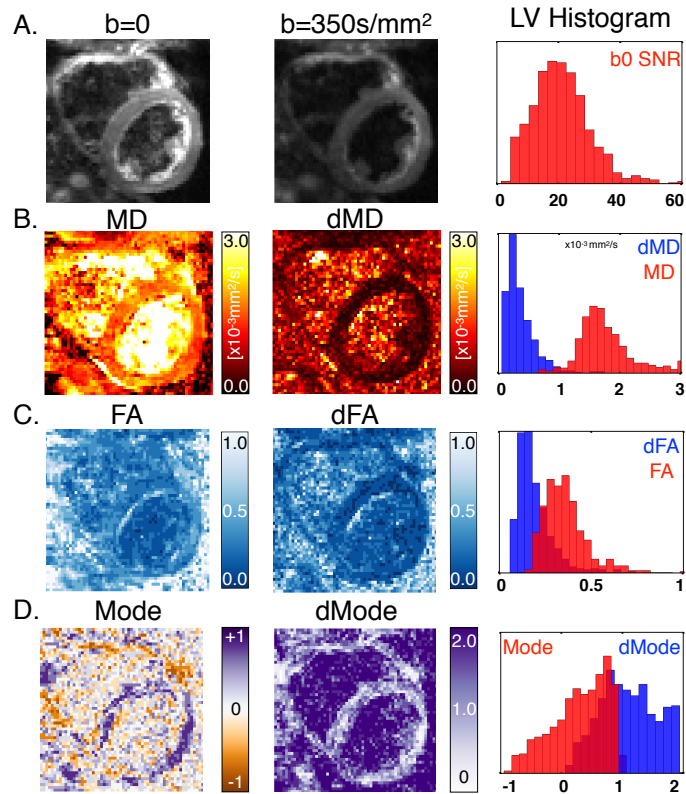

**Supporting Figure S1:** Example diastolic images with  $b=0$  and  $350 \text{ s/mm}^2$  with 5 averages and a histogram of LV  $b=0$  SNR (A). Maps of tensor MD (B), FA (C), and Mode (D) with corresponding uncertainties and LV histograms. Uncertainty was generally higher in diastolic than in mid-systolic cDTI.

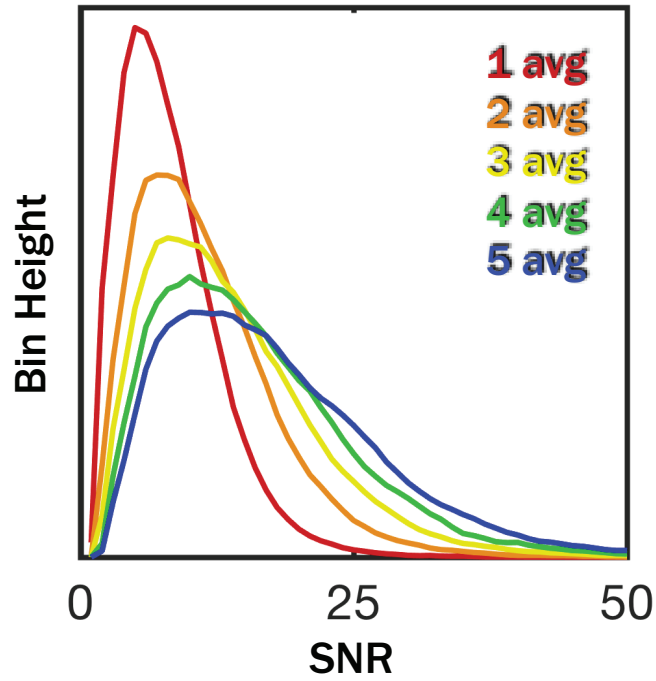

**Supporting Figure S2:** Histograms of b=0 image SNR within the LV with  $N_{\text{avg}}=1-5$  for all subjects and phases. Median ( $\pm 95\text{CI}$ ) SNR increased from  $7.4 \pm 0.3$  with  $N_{\text{avg}}=1$  to  $16.7 \pm 0.7$  with  $N_{\text{avg}}=5$ .
